# Supplementary material for: Identifying the charge storage mechanism in polyimide anodes for Na-ion aqueous batteries by impedance spectroscopy
Source: Royal Society of Chemistry journal article supplement (doi:10.1039/d4ya00037d), 2024-01-01
Supplement: d4ya00037d1.pdf [file d4ya00037d1.pdf]

## Supplementary Information:

### Identifying the Charge Storage Mechanism in Polyimide Anodes for Na-ion Aqueous Batteries by Impedance Spectroscopy

Raphael L. Streng,<sup>a</sup> Sergei Vagin,<sup>b,c</sup> Yuejie Guo,<sup>a</sup> Bernhard Rieger,<sup>c</sup>

Aliaksandr S. Bandarenka,<sup>a,b,\*</sup>

<sup>a</sup> Physics of Energy Conversion and Storage, Physik-Department, Technische Universität München, James-Franck-Str. 1, 85748 Garching, Germany.

<sup>b</sup> Catalysis Research Center TUM, Ernst-Otto-Fischer-Straße 1, 85748 Garching, Germany.

<sup>c</sup> WACKER-Lehrstuhl für Makromolekulare Chemie, Department of Chemistry, Technische Universität München, Lichtenbergstraße 4, 85748 Garching, Germany.

\*E-mail: (A.S.B.) [bandarenka@ph.tum.de](mailto:bandarenka@ph.tum.de)

## Fitting Parameters for the EIS analysis

**Table S1.** Fitting parameters calculated by fitting the impedance spectra at different potentials.

The small relative errors of individual parameters indicate their significance in the description of the impedance response and generally good fit quality. The errors are estimated by the fitting software and reflect the maximum deviation of the respective parameter, for which the root mean square deviation remains below a certain threshold.

| Parameter             | -300 mV vs SSC |           | -400 mV vs SSC |           | -500 mV vs SSC |           | -600 mV vs SSC  |           |
|-----------------------|----------------|-----------|----------------|-----------|----------------|-----------|-----------------|-----------|
|                       | Value          | Error / % | Value          | Error / % | Value          | Error / % | Value           | Error / % |
| $C_{geo} / \mu F$     | 28.9           | 5.98      | 40.4           | 10.2      | 35.5           | 4.37      | 35.0            | 3.77      |
| $C_{dl} / \mu F$      | 118            | 5.01      | 52.7           | 4.79      | 92.2           | 4.37      | 99.7            | 4.03      |
| $C_{a,2} / mF$        | 1.85           | 18.7      | 4.04           | 16.9      | 4.25           | 8.45      | 4.26            | 7.56      |
| $C_{a,1} / mF$        | 15.3           | 3.78      | 60.8           | 2.96      | 104            | 2.39      | 109             | 2.30      |
| $R_U / \Omega$        | 2.52           | 0.59      | 2.51           | 0.39      | 2.51           | 0.23      | 2.51            | 0.21      |
| $R_{geo} / \Omega$    | 0.86           | 2.22      | 0.38           | 2.92      | 0.53           | 1.25      | 0.57            | 1.09      |
| $R_{ct,2} / \Omega$   | 1.20           | 3.38      | 0.99           | 2.39      | 0.66           | 2.22      | 0.66            | 2.06      |
| $R_{a,2} / \Omega$    | 0.77           | 8.13      | 0.57           | 8.55      | 0.70           | 4.56      | 0.72            | 4.08      |
| $R_{ct,1} / \Omega$   | 13.3           | 3.12      | 4.96           | 2.02      | 3.51           | 1.48      | 3.49            | 1.38      |
| $W / \Omega s^{-1/2}$ | 15.8           | 1.42      | 7.94           | 1.93      | 5.33           | 1.71      | 5.09            | 1.63      |
| Parameter             | -700 mV vs SSC |           | -800 mV vs SSC |           | -900 mV vs SSC |           | -1000 mV vs SSC |           |
|                       | Value          | Error / % | Value          | Error / % | Value          | Error / % | Value           | Error / % |
| $C_{geo} / \mu F$     | 32.3           | 2.75      | 30.7           | 2.25      | 28.5           | 2.72      | 1290            | 4.00      |
| $C_{dl} / \mu F$      | 142            | 4.19      | 173            | 4.00      | 148            | 4.15      | 23.5            | 2.67      |
| $C_{a,2} / mF$        | 4.65           | 6.63      | 4.74           | 5.78      | 3.75           | 7.79      | 0.31            | 7.17      |
| $C_{a,1} / mF$        | 114            | 2.41      | 114            | 2.59      | 59.3           | 3.11      | 9.44            | 3.72      |
| $R_U / \Omega$        | 2.53           | 0.19      | 2.55           | 0.17      | 2.57           | 0.23      | 2.61            | 0.41      |
| $R_{geo} / \Omega$    | 0.68           | 0.81      | 0.75           | 0.66      | 0.83           | 0.84      | 1.68            | 1.88      |
| $R_{ct,2} / \Omega$   | 0.55           | 2.10      | 0.51           | 1.95      | 0.66           | 1.98      | 1.31            | 1.49      |
| $R_{a,2} / \Omega$    | 0.68           | 3.43      | 0.67           | 2.82      | 0.63           | 3.44      | 0.95            | 3.08      |
| $R_{ct,1} / \Omega$   | 3.52           | 1.43      | 3.77           | 1.46      | 5.92           | 2.03      | 28.4            | 2.74      |
| $W / \Omega s^{-1/2}$ | 4.26           | 1.47      | 3.61           | 1.34      | 4.69           | 1.23      | 18.8            | 0.81      |
